# Supplementary material for: The Effect of Scandium Ternary Intergrain Precipitates in Al-Containing High-Entropy Alloys
Source: MDPI journal article supplement (doi:10.3390/e20070488), 2018-06-22
Supplement: s1 [file s1]

## SUPPLEMENTARY INFORMATION

# The effect of alloying with scandium in Al-containing High-Entropy Alloys

Sephira Riva <sup>1</sup>, Shahin Mehraban <sup>1</sup>, Nicholas P. Lavery <sup>1</sup>, Stefan Schwarzmüller <sup>2</sup>, Oliver Oeckler <sup>2</sup>, Stephen G. R. Brown <sup>1</sup>, and Kirill V. Yusenkov <sup>1,3,\*</sup>

<sup>1</sup> College of Engineering, Swansea University, Swansea SA1 8EN, Wales, UK

<sup>2</sup> Leipzig University, Faculty of Chemistry and Mineralogy; Institute for Mineralogy, Crystallography and Materials Science; Scharnhorststr. 20, 04275 Leipzig, Germany

<sup>3</sup> Institute of Solid State Chemistry, Pervomaiskaya str. 91, 620990 Ekaterinburg, Russia

**Table S1.** Rationale of the alloys presented in this work, with the corresponding characterization. The acronyms RT, HT and LT refer to synchrotron experiments performed at room temperature, high-temperature and low-temperature respectively. The notation Thermoelectric properties includes the measurement of Seebeck coefficient, electrical conductivity and thermal diffusivity.

| Alloy                                     | Form                          | Performed analysis                                       |
|-------------------------------------------|-------------------------------|----------------------------------------------------------|
| Al <sub>2</sub> CoCrFeNi                  | As cast pellet                | SEM-EDX, Density, Vickers hardness, DSC, Disc punch test |
|                                           | Annealed pellet (850 °C, 12h) | SEM-EDX, RT PXRD                                         |
|                                           | Powder from as-cast pellet    | RT PXRD, HT PXRD, LT PXRD                                |
| Al <sub>2</sub> CoCrFeNi + 0.3wt.% Sc     | As-cast pellet                | SEM-EDX, RT PXRD, Thermoelectric properties              |
| Al <sub>2</sub> CoCrFeNi + 0.5wt.% Sc     | As-cast pellet                | SEM-EDX, RT PXRD, Disc punch test                        |
| Al <sub>2</sub> CoCrFeNi + 2wt.% Sc       | As-cast pellet                | SEM-EDX, RT PXRD, Disc punch test                        |
| Al <sub>2</sub> CoCrFeNi + 3wt.% Sc       | As-cast pellet                | SEM-EDX, Density, RT PXRD, Vickers hardness, DSC         |
|                                           | Annealed pellet (900 °C, 12h) | SEM-EDX, RT PXRD                                         |
|                                           | Powder from as-cast pellet    | RT PXRD, HT PXRD, LT PXRD                                |
| Al <sub>2</sub> CoCrFeNi + 5wt.% Sc       | As-cast pellet                | SEM-EDX, RT PXRD, Thermoelectric properties              |
| Al <sub>0.5</sub> CoCrCuFeNi              | As-cast pellet                | SEM-EDX, Vickers hardness, DSC                           |
|                                           | Annealed pellet (850 °C, 12h) | SEM-EDX                                                  |
|                                           | Powder from as-cast pellet    | RT PXRD, HT PXRD                                         |
| Al <sub>0.5</sub> CoCrCuFeNi + 0.5wt.% Sc | As-cast pellet                | SEM-EDX, Vickers hardness                                |
| Al <sub>0.5</sub> CoCrCuFeNi + 2wt.% Sc   | As-cast pellet                | SEM-EDX, Vickers hardness                                |
| Al <sub>0.5</sub> CoCrCuFeNi + 3wt.% Sc   | As-cast pellet                | SEM-EDX, Vickers hardness, DSC                           |
|                                           | Annealed pellet (930 °C, 6h)  | SEM-EDX                                                  |
|                                           | Powder from as-cast pellet    | RT PXRD, HT PXRD                                         |
| AlCoCrCu <sub>0.5</sub> FeNi              | As-cast pellet                | SEM-EDX, Vickers hardness, DSC, Disc punch test          |
|                                           | Annealed pellet (850 °C, 12h) | SEM-EDX                                                  |
|                                           | Powder from as-cast pellet    | RT PXRD                                                  |
| AlCoCrCu <sub>0.5</sub> FeNi + 0.5wt.% Sc | As-cast pellet                | SEM-EDX, Vickers hardness                                |
| AlCoCrCu <sub>0.5</sub> FeNi + 2wt.% Sc   | As-cast pellet                | SEM-EDX, Vickers hardness                                |

|                                         |                              |                                                    |
|-----------------------------------------|------------------------------|----------------------------------------------------|
| AlCoCrCu <sub>0.5</sub> FeNi + 3wt.% Sc | As-cast pellet               | SEM-EDX, Vickers hardness,<br>DSC, Disc punch test |
|                                         | Annealed pellet (930 °C, 6h) | SEM-EDX                                            |
|                                         | Powder from as-cast pellet   | RT PXRD                                            |

### Atomic composition and element distribution according to EDX maps.

**Table S2.** Atomic composition of the synthesized samples according to EDX map (x500, x2000).

|    | Al <sub>2</sub> CoCrFeNi<br>at. % |                    | Al <sub>2</sub> CoCrFeNi +<br>3wt.% Sc |                                     | Al <sub>0.5</sub> CoCrCuFeNi<br>at. % |                    | Al <sub>0.5</sub> CoCrCuFeNi +<br>3wt.% Sc |                                     | AlCoCrCu <sub>0.5</sub> FeNi<br>at. % |                    | AlCoCrCu <sub>0.5</sub> FeNi +<br>3wt.% Sc |                                     |
|----|-----------------------------------|--------------------|----------------------------------------|-------------------------------------|---------------------------------------|--------------------|--------------------------------------------|-------------------------------------|---------------------------------------|--------------------|--------------------------------------------|-------------------------------------|
|    | As<br>melted<br>(±0.04)           | Anneal.<br>(±0.04) | Grain<br>at. %<br>(±0.05)              | Inter-<br>grain<br>at. %<br>(±0.03) | As<br>melted<br>(±0.03)               | Anneal.<br>(±0.04) | Grain<br>at. %<br>(±0.04)                  | Inter-<br>grain<br>at. %<br>(±0.04) | As<br>melted<br>(±0.03)               | Anneal.<br>(±0.04) | Grain<br>at. %<br>(±0.05)                  | Inter-<br>grain<br>at. %<br>(±0.04) |
| Al | 44.4(3)                           | 39.5(1)            | 29.2(6)                                | 18.4(2)                             | 13.2(2)                               | 6.6(3)             | 7.2(6)                                     | 2.8(5)                              | 22.8(2)                               | 27.5(7)            | 10.7(1)                                    | 8.8(3)                              |
| Co | 14.7(2)                           | 15.7(7)            | 19.6(4)                                | 16.2(8)                             | 17.9(4)                               | 19.8(3)            | 20.4(0)                                    | 3.2(3)                              | 17.2(5)                               | 16.8(0)            | 21.3(3)                                    | 10.6(0)                             |
| Cr | 13.6(2)                           | 13.8(2)            | 14.1(8)                                | 11.1(1)                             | 16.6(6)                               | 18.0(6)            | 17.3(2)                                    | 1.6(5)                              | 17.6(0)                               | 16.0(6)            | 29.9(3)                                    | 6.3(2)                              |
| Cu | -                                 | -                  | -                                      | -                                   | 16.9(4)                               | 11.1(9)            | 16.2(7)                                    | 75.7(4)                             | 8.6(7)                                | 6.9(7)             | 6.0(1)                                     | 51.8(6)                             |
| Fe | 14.3(4)                           | 15.1(4)            | 16.5(1)                                | 17.7(1)                             | 18.5(1)                               | 20.1(4)            | 20.2(3)                                    | 2.4(8)                              | 17.8(4)                               | 16.8(9)            | 23.2(5)                                    | 8.6(1)                              |
| Ni | 12.8(9)                           | 15.7(7)            | 19.9(9)                                | 19.4(5)                             | 17.5(2)                               | 17.6(8)            | 18.2(6)                                    | 10.6(5)                             | 15.8(1)                               | 15.7(1)            | 14.6(3)                                    | 13.0(4)                             |
| Sc | -                                 | -                  | 0.4(2)                                 | 17.0(2)                             | -                                     | -                  | 0.2(2)                                     | 3.4(1)                              | -                                     | -                  | 0.1(4)                                     | 0.7(5)                              |

Element distribution of the as-cast and annealed alloys according to EDX maps

a.  $\text{Al}_2\text{CoCrFeNi}$  as cast

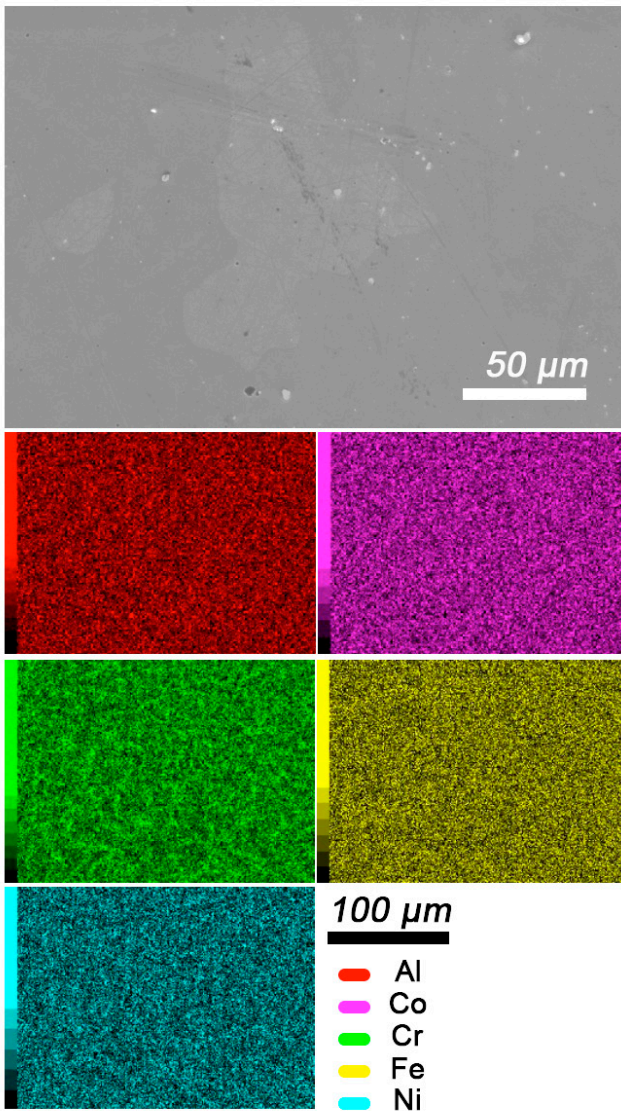

b.  $\text{Al}_2\text{CoCrFeNi}$  annealed

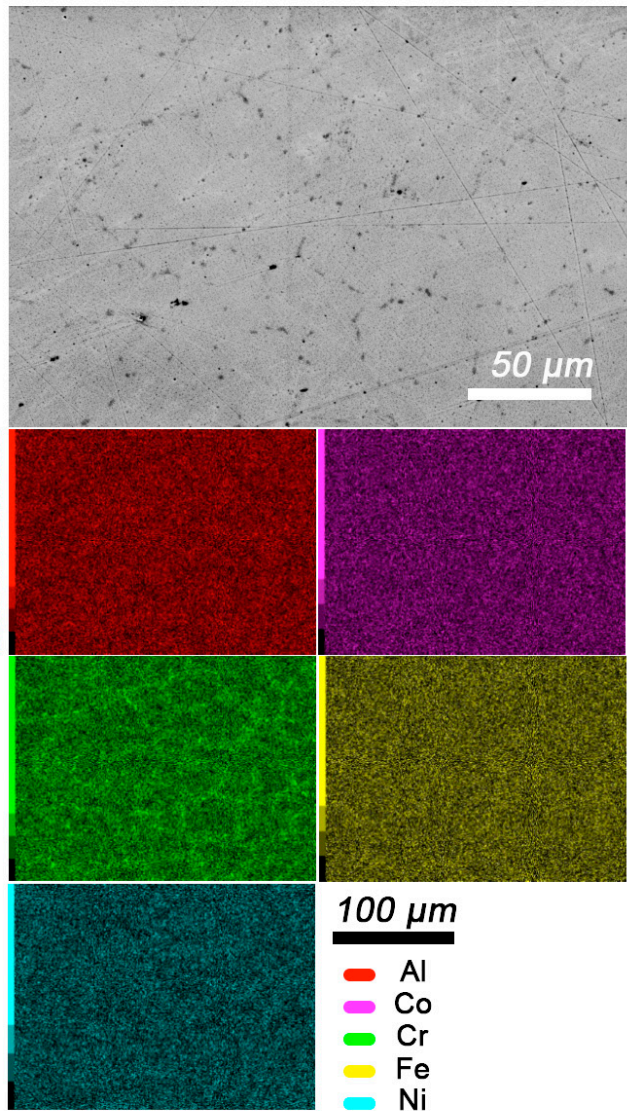

**Figure S1.** BSE images and element distribution of as cast and annealed  $\text{Al}_2\text{CoCrFeNi}$  samples according to EDX. From top to bottom and left to right, elements are: Al, Co, Cr, Fe, Ni.



a.  $\text{Al}_{0.5}\text{CoCrCuFeNi}$  as cast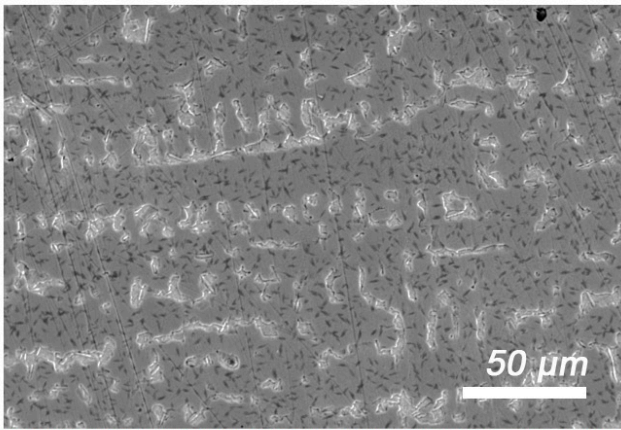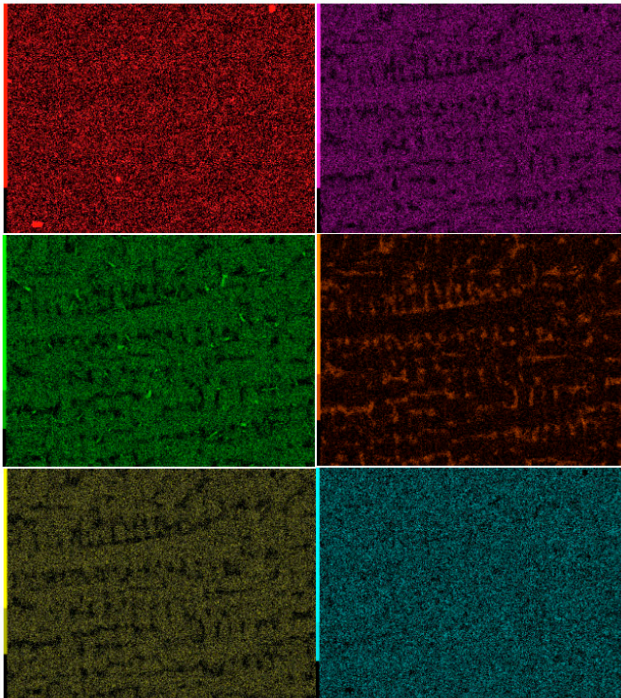100  $\mu\text{m}$ 

|    |    |
|----|----|
| Al | Co |
| Cr | Cu |
| Fe | Ni |

b.  $\text{Al}_{0.5}\text{CoCrCuFeNi}$  annealed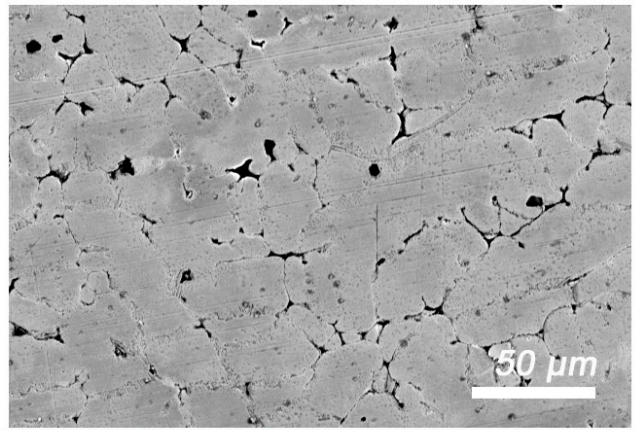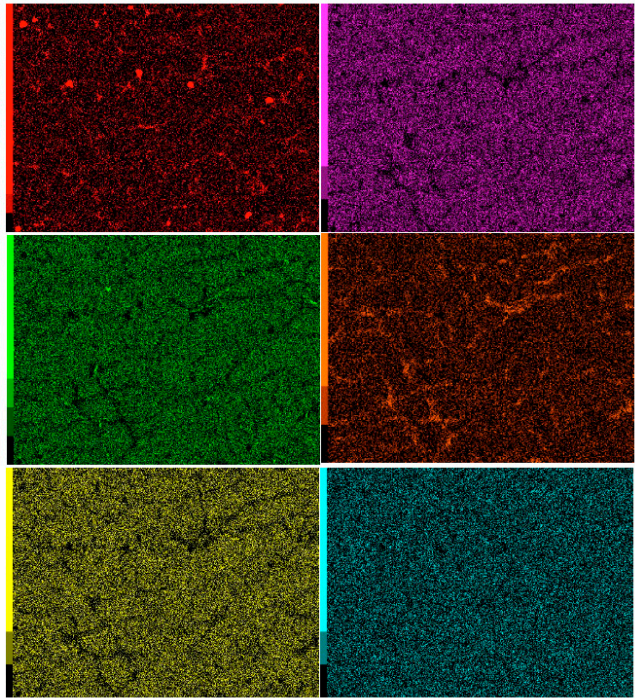100  $\mu\text{m}$ 

|    |    |
|----|----|
| Al | Co |
| Cr | Cu |
| Fe | Ni |

**Figure S2.** BSE images and element distribution of as cast and annealed  $\text{Al}_{0.5}\text{CoCrCuFeNi}$  samples according to EDX. From top to bottom and left to right, elements are: Al, Co, Cr, Cu, Fe, Ni.



a. AlCoCrCu<sub>0.5</sub>FeNi as cast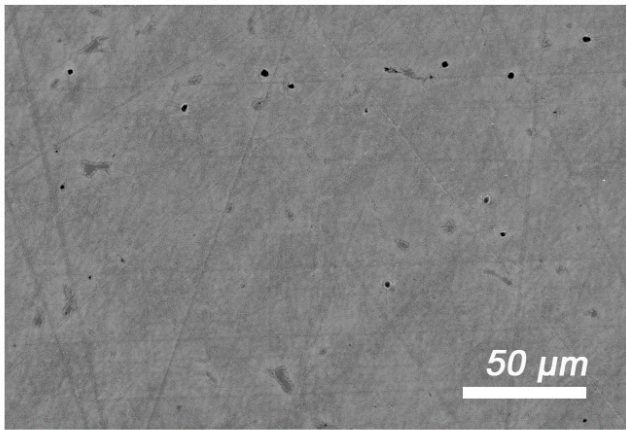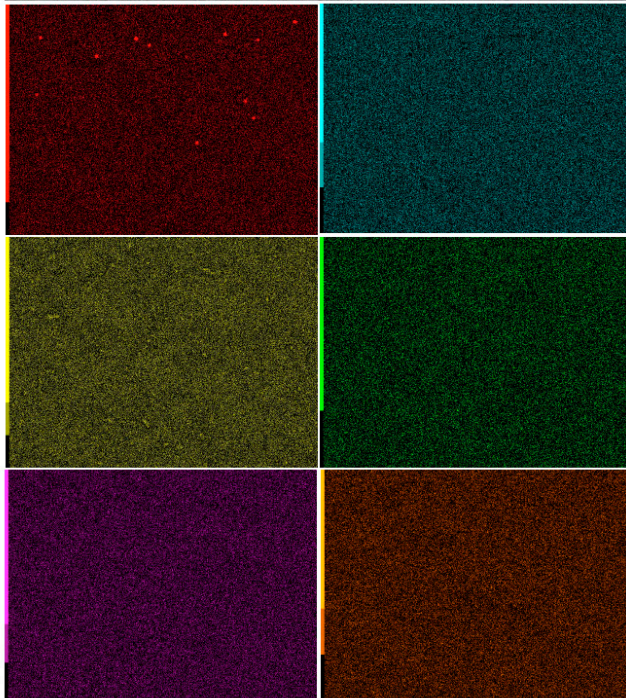

100 μm

|    |    |
|----|----|
| Al | Co |
| Cr | Cu |
| Fe | Ni |

b. AlCoCrCu<sub>0.5</sub>FeNi annealed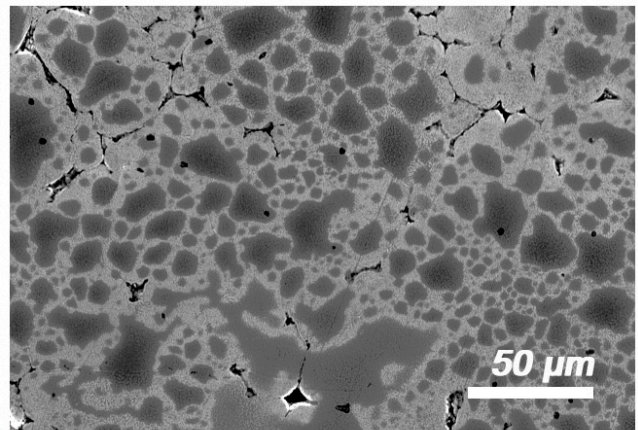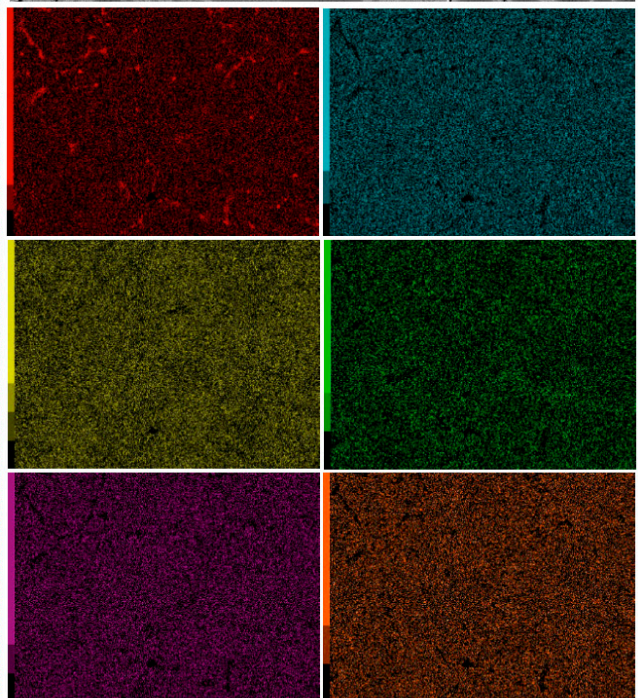

100 μm

|    |    |
|----|----|
| Al | Co |
| Cr | Cu |
| Fe | Ni |

**Figure S3.** BSE images and element distribution of as cast and annealed AlCoCrCu<sub>0.5</sub>FeNi samples according to EDX. From top to bottom and left to right, elements are: Al, Co, Cr, Cu, Fe, Ni.

Element distribution of the as-cast Sc-containing alloys according to EDX maps

$\text{Al}_2\text{CoCrFeNi} + 3 \text{ wt.}\% \text{ Sc}$  (as cast)

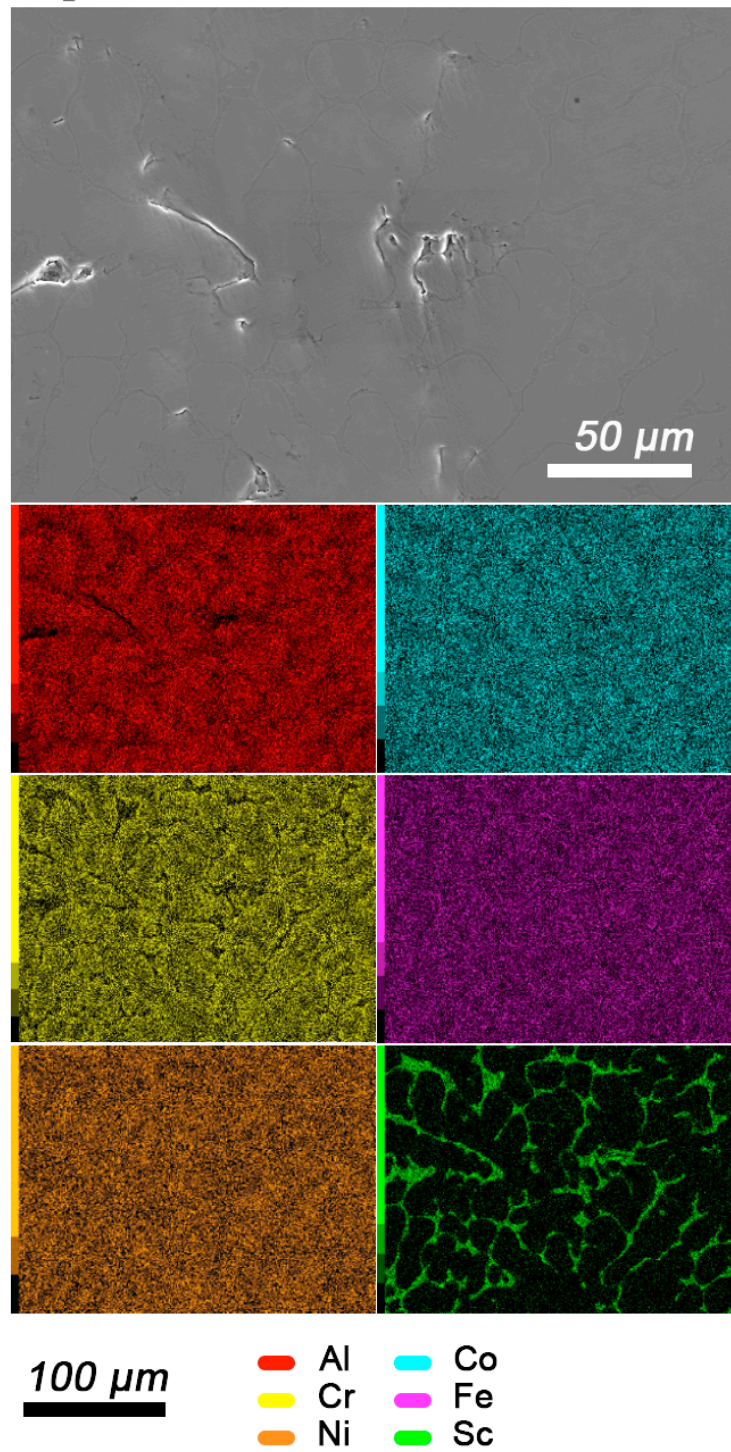

**Figure S4.** BSE image and element distribution of as cast  $\text{Al}_2\text{CoCrFeNi} + 3\text{wt.}\%\text{Sc}$  samples according to EDX. From top to bottom and left to right, elements are: Al, Co, Cr, Fe, Ni and Sc.



$\text{Al}_{0.5}\text{CoCrCuFeNi} + 3 \text{ wt.}\% \text{ Sc}$  (as cast)

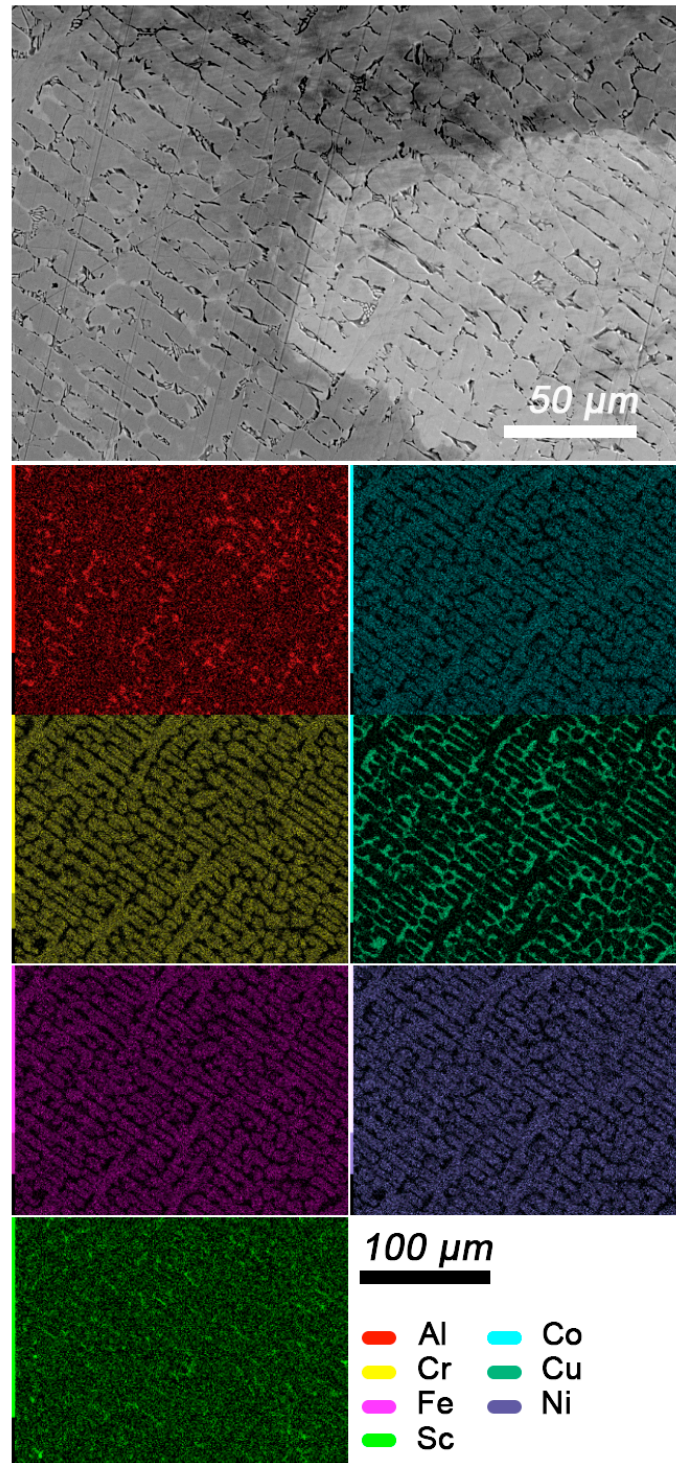

**Figure S5.** BSE image and element distribution of as cast  $\text{Al}_{0.5}\text{CoCrCuFeNi} + 3\text{wt.}\%\text{Sc}$  samples according to EDX. From top to bottom and left to right, elements are: Al, Co, Cr, Cu, Fe, Ni and Sc.



$\text{AlCoCrCu}_{0.5}\text{FeNi} + 3 \text{ wt.}\% \text{ Sc (as cast)}$

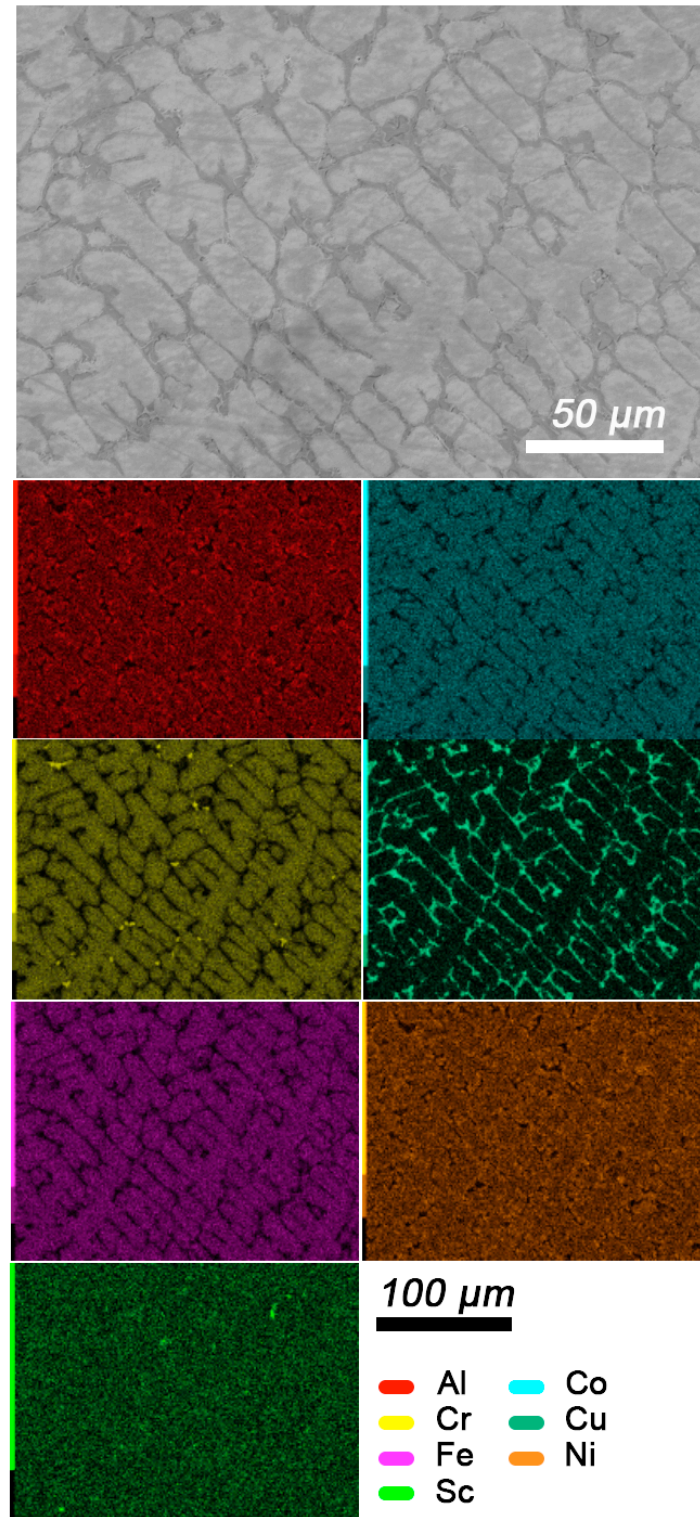

**Figure S6.** BSE image and element distribution of as cast  $\text{AlCoCrCu}_{0.5}\text{FeNi} + 3\text{wt.}\%\text{Sc}$  samples according to EDX. From top to bottom and left to right, elements are: Al, Co, Cr, Cu, Fe, Ni and Sc.

### Mechanical properties: disk-punch test

Applied force was plotted against disk's displacement. To normalize the disks for the standard 0.5 mm thickness, the following equation(s) were used:

**Ultimate tensile strength for brittle materials [MPa = Nmm<sup>-2</sup>] [1]**

$$Cl = A - (D + 2t) = 8 - (4 + 2t)$$

$$UTS = \frac{F_m}{t(0.14D - 0.82Cl + 2.17u_m + 0.6)}$$

Where  $F_m$  is the maximum load during PT,  $t$  is the disk thickness in mm,  $D$  is the punch diameter (4 mm),  $Cl$  is the die clearance in mm and  $u_m$  is the displacement at failure. In the first equation,  $A$  is the diameter of the lower die (8 mm).

**Punch test results obtained after normalizing thickness to 0.5mm: [2]**

The inflexion point is a constant in the following equations.

For  $P_{test} < P_{inflexion}$

$$P_{0.5} = 0.5^2 \left( \frac{P_{test}}{t^2} \right)$$

For  $P_{test} > P_{inflexion}$

$$P_{0.5} = 0.5 \left( \frac{P_{test}}{t} \right) + 0.5 P_{inflexion} \left( \frac{0.5 - t}{t^2} \right)$$

Ultimate tensile strength [MPa = Nmm<sup>-2</sup>]

$$UTS = \frac{0.4964 F_m}{u_m h_o} - 94.146$$

Yield stress

$$YS = \frac{0.4454 F_e}{h_o^2} + 86.866$$

Where  $F_m$  is the maximum load during PT,  $u_m$  is the displacement related to the maximum load  $F_m$ ,  $h_o$  is the normalized thickness (0.5mm) and  $F_e$  is the load illustrating the conversion between linearity and yield zone (intersection between zone 1 and 2). [3]

Fracture stress for brittle materials

$$\sigma_f = 130 \frac{F_m}{t^2} - 320$$

Fracture toughness for brittle materials

$$K_{IC} = 0.07(\sigma_f)^{2/3}$$

The units of KIC are MPa,  $F_m$  is in N and  $t$  is the initial thickness in mm. [4]

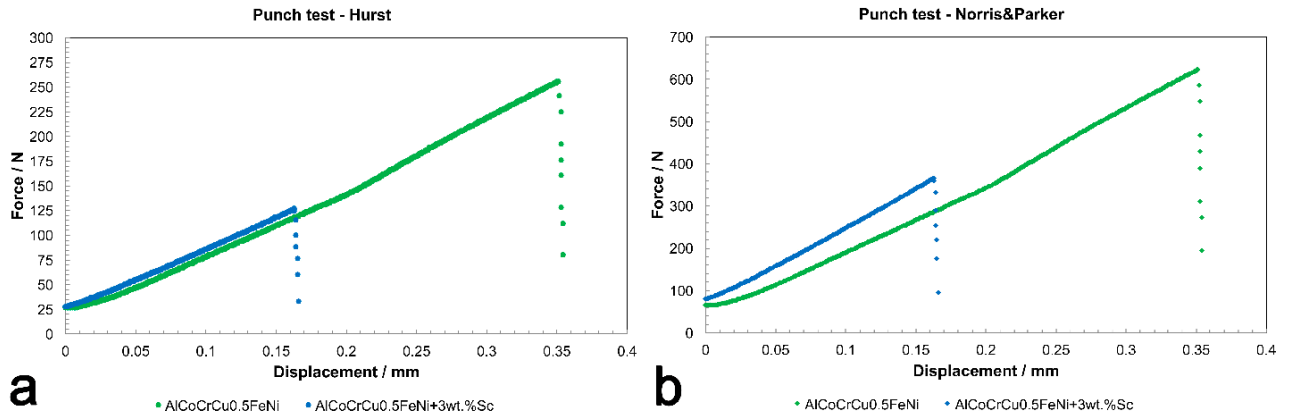

**Figure S7.** Disk punch test for the  $\text{AlCoCrCu}_{0.5}\text{FeNi}$  HEA with 0 and 3wt.% Sc, data elaborated according to the equations reported by Norris and Parker (*right*) and Hurst (*left*) [1], [3].

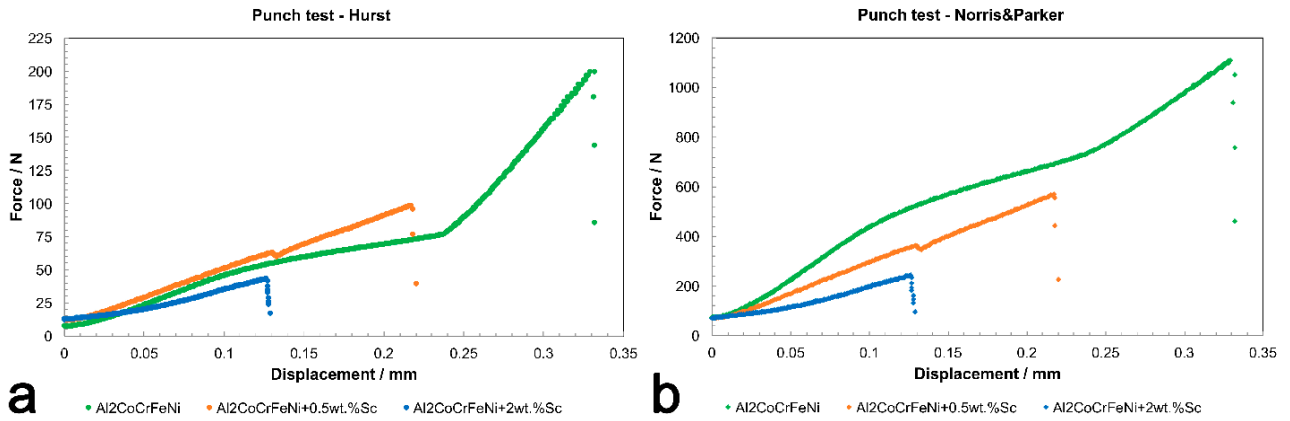

**Figure S8.** Disk punch test for the  $\text{Al}_2\text{CoCrFeNi}$  alloy with 0, 0.5 and 2wt.% Sc, data elaborated according to the equations reported by Hurst (*left*) and Norris and Parker (*right*) [1], [3].



# Element distribution of the annealed alloys according to EDX maps

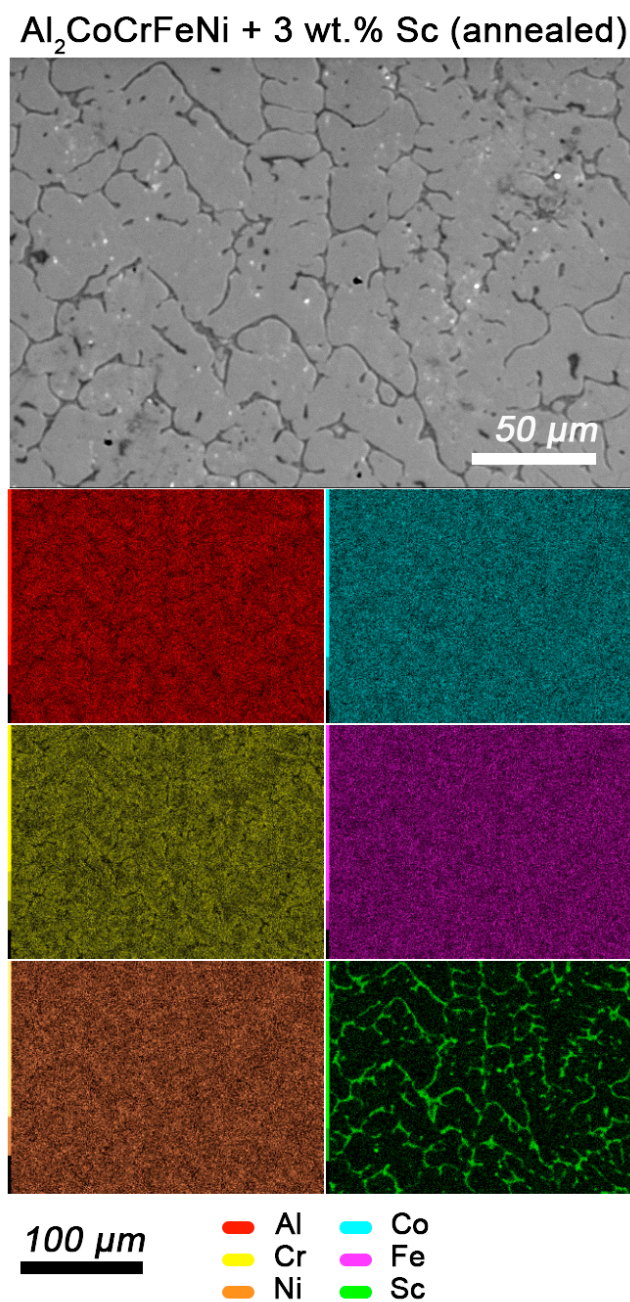

**Figure S9.** BSE image and element distribution of  $\text{Al}_2\text{CoCrFeNi} + 3 \text{ wt.}\% \text{ Sc}$  samples after annealing at  $900^\circ\text{C}$ , 12h. Data from EDX maps. From top to bottom and left to right, elements are: Al, Co, Cr, Fe, Ni and Sc.

$\text{Al}_{0.5}\text{CoCrCuFeNi} + 3 \text{ wt.}\% \text{ Sc}$  (annealed)

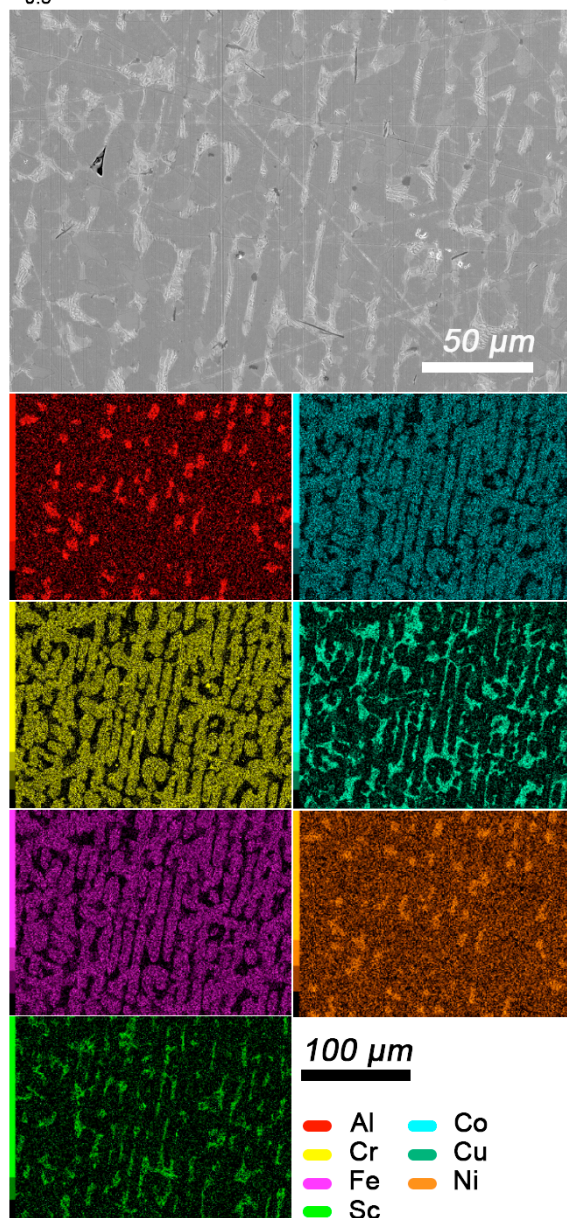

**Figure S10.** BSE image and element distribution in  $\text{Al}_{0.5}\text{CoCrCuFeNi} + 3\text{wt.}\%\text{Sc}$  samples after annealing at  $930^\circ\text{C}$ , 6h, respectively. Data from EDX maps. From top to bottom and left to right, elements are: Al, Co, Cr, Cu, Fe, Ni and Sc.

AlCoCrCu<sub>0.5</sub>FeNi + 3 wt.% Sc (annealed)

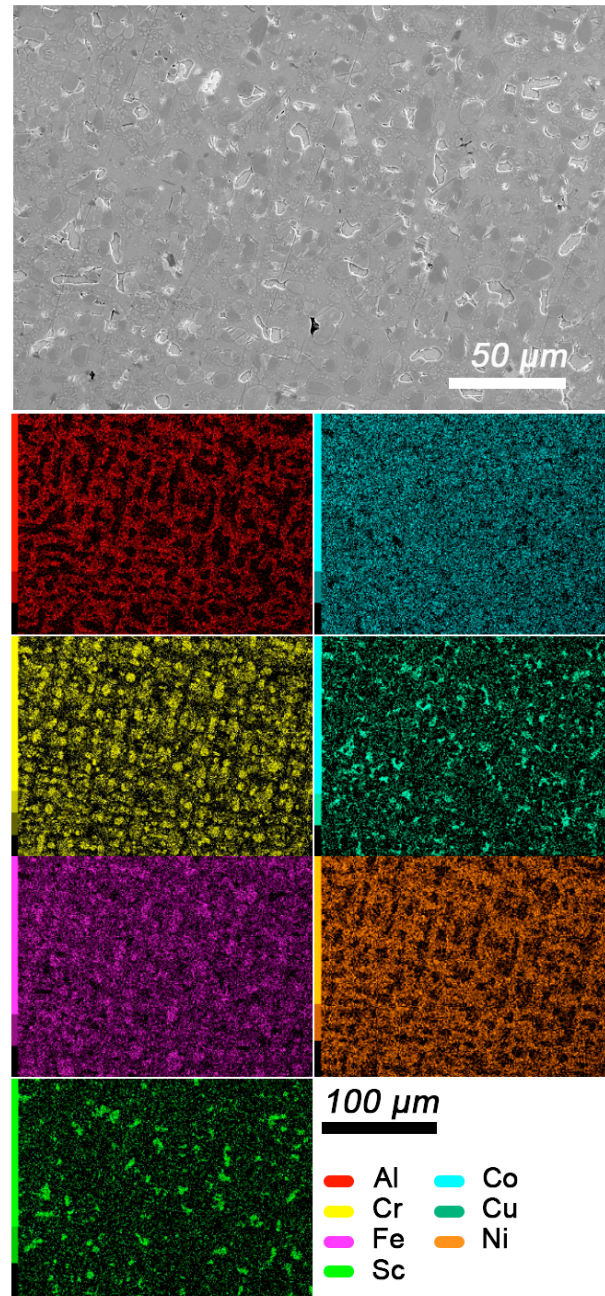

**Figure S11.** BSE image and element distribution of AlCoCrCu<sub>0.5</sub>FeNi +3wt.%Sc samples after annealing at 930°C, 6h, respectively. Data from EDX maps. From top to bottom and left to right, elements are: Al, Co, Cr, Cu, Fe, Ni and Sc.



## Electrical and thermal transport measurements

**Table S3.** Density and Dulong-Petit heat capacity used for the calculation of thermal conductivity.

| Composition                                       | Density (in $\text{g cm}^{-3}$ ) | $C_p$ (Dulong-Petit, in $\text{J g}^{-1} \text{K}^{-1}$ ) |
|---------------------------------------------------|----------------------------------|-----------------------------------------------------------|
| $\text{Al}_2\text{CoCrFeNi} + 5 \text{ w\% Sc}$   | 5.99                             | 0.53651                                                   |
| $\text{Al}_2\text{CoCrFeNi} + 0.3 \text{ w\% Sc}$ | 6.35                             | 0.53565                                                   |

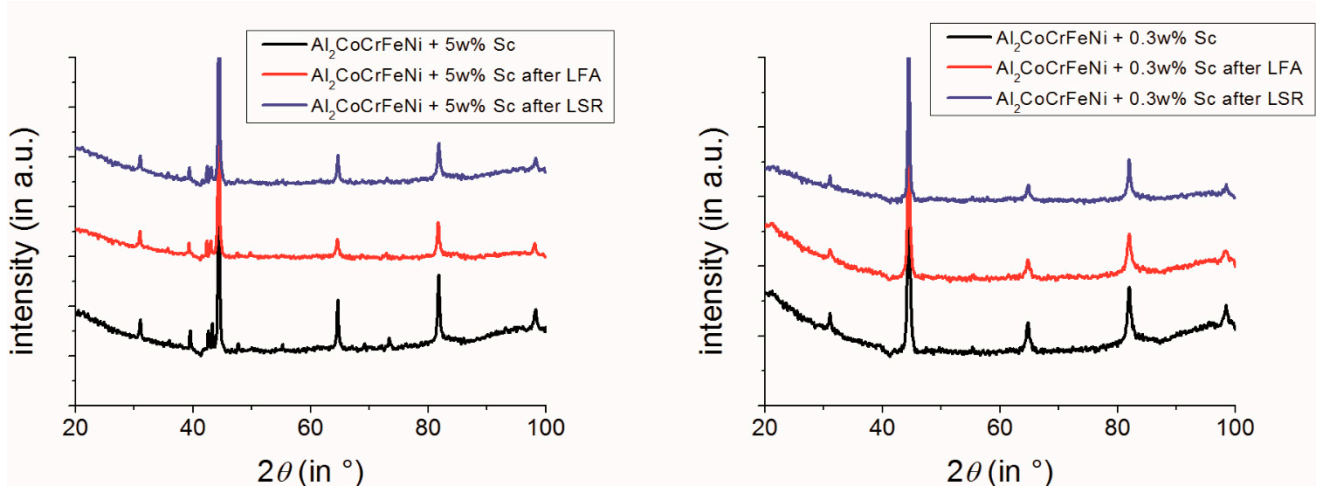

**Figure S12.** PXRD data of  $\text{Al}_2\text{CoCrFeNi} + 5 \text{ w\% Sc}$  (left) and  $\text{Al}_2\text{CoCrFeNi} + 0.3 \text{ w\% Sc}$  (right) before thermoelectric measurements (black) and after LFA (red) and LSR (blue), respectively.

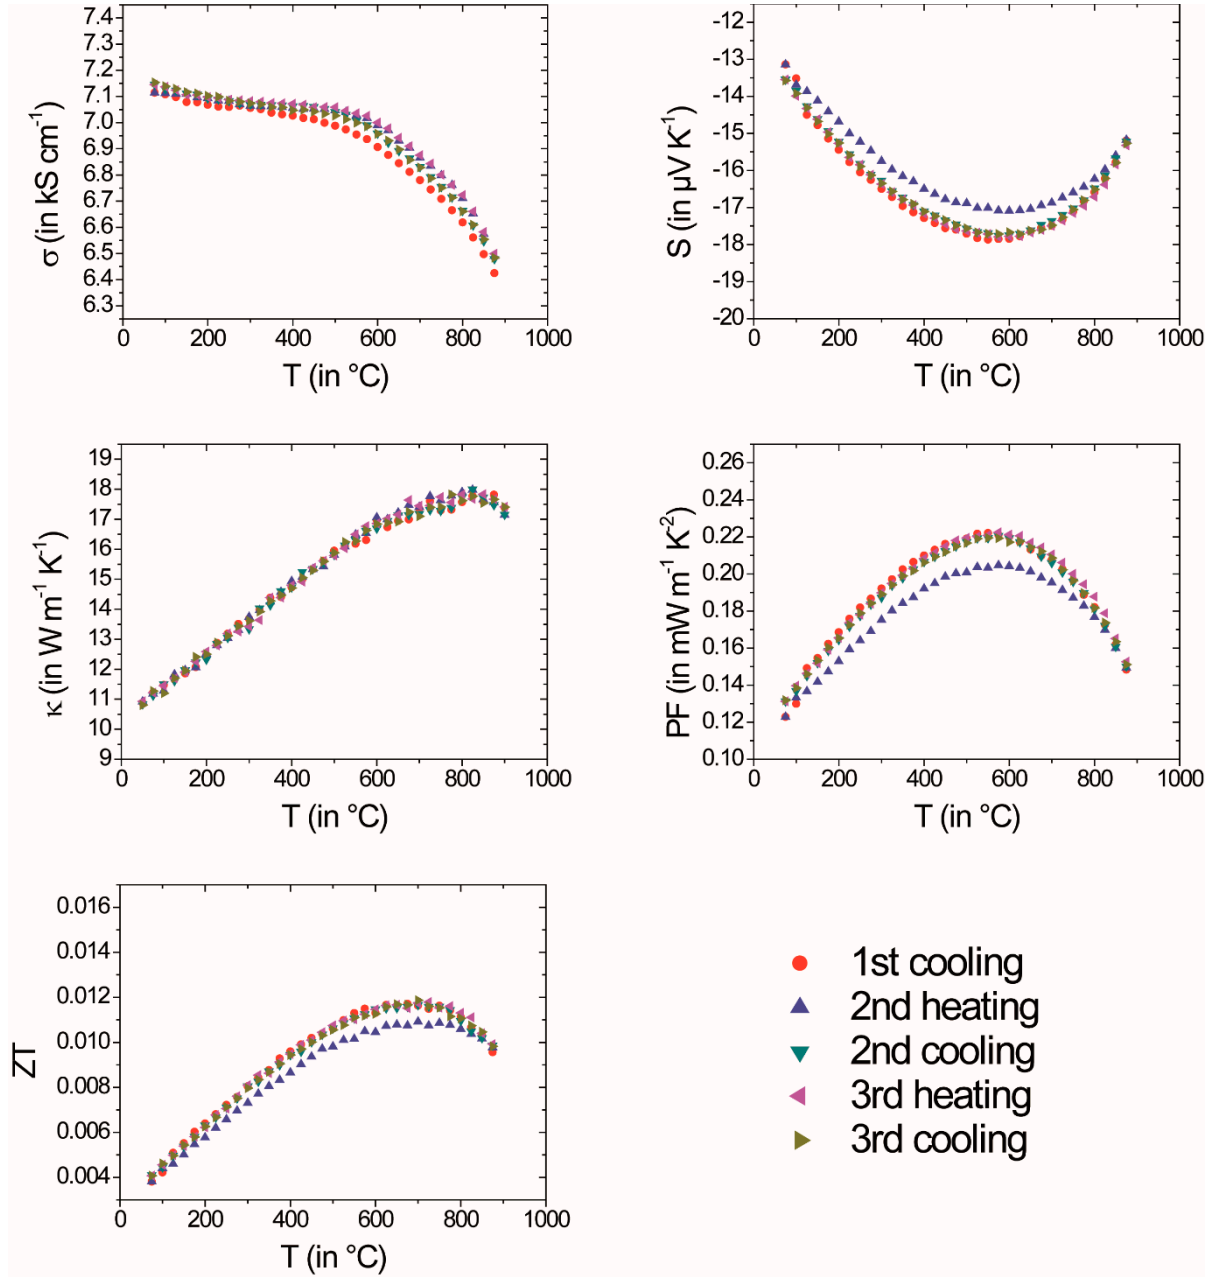

**Figure S13.** Thermoelectric properties of  $\text{Al}_2\text{CrCoFeNi} + 5 \text{ w\% Sc}$  for three consecutive cycles (without first heating) up to 875  $^{\circ}\text{C}$ : electrical conductivity  $\sigma$  (top, left), Seebeck coefficient  $S$  (top, right), thermal conductivity  $\kappa$  (middle, left), power factor  $\text{PF}$  (middle, right) and thermoelectric figure of merit  $ZT$  (bottom, left).

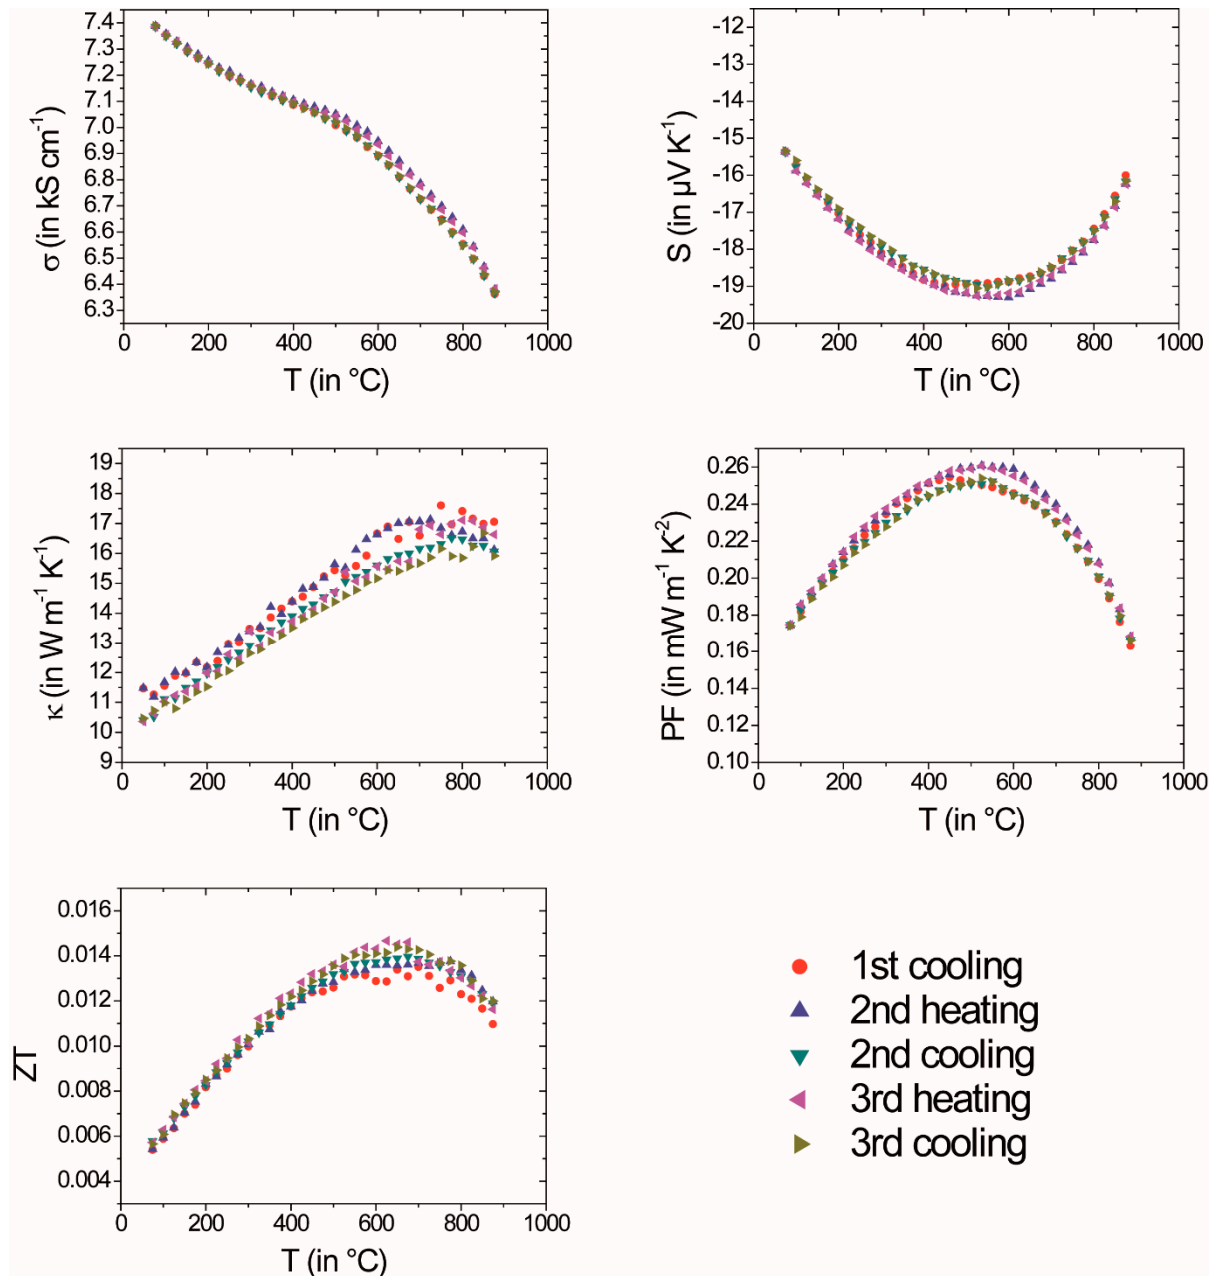

**Figure S14.** Thermoelectric properties of  $\text{Al}_2\text{CrCoFeNi} + 0.3 \text{ w\% Sc}$  for three consecutive cycles (without first heating) up to 875 °C: electrical conductivity  $\sigma$  (top, left), Seebeck coefficient  $S$  (top, right), thermal conductivity  $\kappa$  (middle, left), power factor  $\text{PF}$  (middle, right) and thermoelectric figure of merit  $\text{ZT}$  (bottom, left).

## References

1. Norris, S.D., Parker, J.D., Deformation processes during disc bend loading, *Mat. Sci. Technol.* **1996**, 12, 163-170.
2. Lacalle, R., Alvarez, J.A., Gutiérrez-Solana, F., Analysis of key factors for the interpretation of small punch test results, *Fatigue Fract. of Eng. Mat Struct.* **2008**, 31, 841-849.
3. Hurst, R., The european code of practice for small punch testing: where do we go from here?, *Metall. J.* **2010**, 63, 5-11.
4. Džugan, J., Konopik, P., Evaluation of fracture toughness properties for low carbon steel in the brittle state by small punch test technique, *Metall. J.* **2010**, 63, 119-122.
